# Supplementary material for: Quantification of cognitive impairment to characterize heterogeneity of patients at risk of developing Alzheimer's disease dementia
Source: PubMed Central journal article supplement — Alzheimers Dement (Amst). 2021 Sep 14;13(1):e12237. doi: 10.1002/dad2.12237 (PMC8439141; doi:10.1002/dad2.12237), 2021-09-14
Supplement: DAD2-13-e12237-s002.pdf [file DAD2-13-e12237-s002.pdf]

# Supplementary File B

## 1 Factor analysis formulation

One of the goals of factor analysis methods is to quantify the association of each variable with more fundamental entities that explain the correlations among observations [1]. Let the vector  $\mathbf{y}_i \in \mathbb{R}^{m \times 1}$  be the  $i$ -th observation of  $m$  variables, and  $\mathbf{z}_i \in \mathbb{R}^{p \times 1}$  the unobserved measures of  $p$  factors. The *common factor model* states:

$$\mathbf{y}_i = \mathbf{F}\mathbf{z}_i + \mathbf{e}_i \quad (1)$$

Or component-wise:

$$y_{ij} = \sum_{k=1}^m f_{jk} z_{ik} + e_{ij} \quad (2)$$

Matrix  $\mathbf{F} \in \mathbb{R}^{m \times p}$  contains the *factor loadings*, also known as the factor structure. Residuals  $e_{.j} \in \mathbb{R}^{1 \times m}$  contain the portion of the  $j$ -th variable that is not defined by the factors and matrix of residuals correlations  $\mathbf{C}_e \in \mathbb{R}^{m \times m}$  is assumed diagonal. Therefore, components of the correlation matrix between observed variables  $\mathbf{C}_y \in \mathbb{R}^{m \times m}$  are given by:

$$\begin{aligned} [\mathbf{C}_y]_{jl} &= \text{corr}(y_{.j}, y_{.l}) \\ &= \sum_{s=1}^m \sum_{t=1}^m f_{js} f_{lt} [\mathbf{C}_z]_{st} \quad \text{for } j \neq l \end{aligned} \quad (3)$$

Exploratory Factor Analysis (EFA) consists in estimating the matrices  $\mathbf{F}$ ,  $\mathbf{C}_z$ , and  $\mathbf{C}_e$  to find out an underlying factor structure, while Confirmatory Factor Analysis (CFA) estimates the coefficients for an hypothesized model from Equation 3. The resulting factor structure matrix  $\mathbf{F} \in \mathbb{R}^{m \times p}$  quantifies the influence of the  $p$  unobserved factors over the  $m$  observed variables.

### 1.1 Factor scores

Given the factor model,  $\mathbf{F}$ ,  $\mathbf{C}_z$ , and  $\mathbf{C}_e$ , the unobserved factor scores  $\mathbf{z}$  can be estimated with various methods [2] that are based on the linear relations between factors  $\mathbf{z}_i$  and standardized observations  $\mathbf{y}_i$ . That is, the estimated vector of factors,  $\hat{\mathbf{z}}_i$ , for a particular case  $i$  is estimated as:

$$\hat{\mathbf{z}}_i = \mathbf{W}\mathbf{y}_i \quad (4)$$

The *weight matrix*  $\mathbf{W} \in \mathbb{R}^{p \times m}$  that minimizes the sum of squares of the uniqueness [3], *i.e.*, the portion of the observations variance that is not explained by the factors, is given by:

$$\mathbf{W} = (\mathbf{F}^T \mathbf{C}_e^{-1} \mathbf{F})^{-1} \mathbf{F}^T \mathbf{C}_e^{-1} \quad (5)$$

where  $\mathbf{C}_e$  is the residuals covariance matrix.

## 2 Factor analysis in this work

Inputs:

- $\mathbf{y}_i \in \mathbb{R}^{35 \times 1}$ : vector of observed sub-scores transformed into standardized regression based (SRB)  $z$ -scores for each subject  $i$ .
- $\mathbf{C}_y \in \mathbb{R}^{35 \times 35}$ : matrix of correlations between SRB  $z$ -scores.

Outputs:

- $\mathbf{F} \in \mathbb{R}^{35 \times 6}$ : factor structure matrix quantifying the influence of each domain in the observed SRB  $z$ -scores.
- $\mathbf{W} \in \mathbb{R}^{6 \times 35}$ : matrix of weights for domain score calculation.
- $\mathbf{z}_i \in \mathbb{R}^{6 \times 1}$ : vector of un-observed domain scores for each subject  $i$ .

Table 1: Weight of each sub-score in the calculation of the 6 domain scores (Matrix  $\mathbf{W}^T$ ). Complete description of each sub-score code is presented in Supplementary File A.

| Sub-score   | Domain |          |           |              |             |           |
|-------------|--------|----------|-----------|--------------|-------------|-----------|
|             | Memory | Language | Executive | Visuospatial | Orientation | Attention |
| Q1SCORE     | 0.126  | 0        | 0         | 0            | 0           | 0         |
| Q4SCORE     | 0.125  | 0        | 0         | 0            | 0           | 0         |
| MOCADLREC   | 0.061  | 0        | 0         | 0            | 0           | 0         |
| RAVLT.IMMED | 0.15   | 0        | 0         | 0            | 0           | 0         |
| AVTOT6      | 0.128  | 0        | 0         | 0            | 0           | 0         |
| AVTOTB      | 0.052  | 0        | 0         | 0            | 0           | 0         |
| AVDEL30MIN  | 0.068  | 0        | 0         | 0            | 0           | 0         |
| AVDELTOT    | 0.052  | 0        | 0         | 0            | 0           | 0         |
| LIMMTOTAL   | 0.085  | 0        | 0         | 0            | 0           | 0         |
| LDELTTOTAL  | 0.113  | 0        | 0         | 0            | 0           | 0         |
| MMRECALL    | 0.039  | 0        | 0         | 0            | 0           | 0         |
| Q5SCORE     | 0      | 0.097    | 0         | 0            | 0           | 0         |
| MOCANAM     | 0      | 0.093    | 0         | 0            | 0           | 0         |
| BMNOCUE     | 0      | 0.291    | 0         | 0            | 0           | 0         |
| CATANIMSC   | 0      | 0.306    | 0         | 0            | 0           | 0         |
| Q13SCORE    | 0      | 0        | 0.026     | 0            | 0           | 0         |
| TRAASCOR    | 0      | 0        | 0.065     | 0            | 0           | 0         |
| TRABSCOR    | 0      | 0        | 0.224     | 0            | 0           | 0         |
| MOCASERIAL  | 0      | 0        | 0.036     | 0            | 0           | 0         |
| TRAILS      | 0      | 0        | 0.025     | 0            | 0           | 0         |
| CLOCKSCOR   | 0      | 0        | 0         | 0.395        | 0           | 0         |
| COPYSCOR    | 0      | 0        | 0         | 0.229        | 0           | 0         |
| MOCACLOCK   | 0      | 0        | 0         | 0.448        | 0           | 0         |
| Q3SCORE     | 0      | 0        | 0         | 0.157        | 0           | 0         |
| CUBE        | 0      | 0        | 0         | 0.164        | 0           | 0         |
| MMDRAW      | 0      | 0        | 0         | 0.048        | 0           | 0         |
| Q7SCORE     | 0      | 0        | 0         | 0            | 0.331       | 0         |
| MMORITIME   | 0      | 0        | 0         | 0            | 0.313       | 0         |
| MMORISPACE  | 0      | 0        | 0         | 0            | 0.114       | 0         |
| MOCAORI     | 0      | 0        | 0         | 0            | 0.418       | 0         |
| Q9SCORE     | 0      | 0        | 0         | 0            | 0           | 0.074     |
| Q10SCORE    | 0      | 0        | 0         | 0            | 0           | 0.092     |
| Q11SCORE    | 0      | 0        | 0         | 0            | 0           | 0.204     |
| Q12SCORE    | 0      | 0        | 0         | 0            | 0           | 0.148     |
| Q2SCORE     | 0      | 0        | 0         | 0            | 0           | 0.085     |

## References

- [1] R. Cudeck, "Exploratory factor analysis," in *Handbook of Applied Multivariate Statistics and Mathematical Modeling* (H. E. Tinsley and S. D. Brown, eds.), pp. 265 – 296, San Diego: Academic Press, 2000.
- [2] J. W. Grice, "Computing and evaluating factor scores.," *Psychological Methods*, vol. 6, 2001.
- [3] M. S. Bartlett, "The statistical conception of mental factors.," *British Journal of Psychology. General Section*, vol. 28, pp. 97–104, jul 1937.
