# Supplementary material for: Quantification of cognitive impairment to characterize heterogeneity of patients at risk of developing Alzheimer's disease dementia
Source: PubMed Central journal article supplement — Alzheimers Dement (Amst). 2021 Sep 14;13(1):e12237. doi: 10.1002/dad2.12237 (PMC8439141; doi:10.1002/dad2.12237), 2021-09-14
Supplement: DAD2-13-e12237-s003.pdf [file DAD2-13-e12237-s003.pdf]

# Supplementary File A

The initial set of 50 sub-scores from 9 neuropsychological tests considered for the analysis.

| Sub-score code | Test                                 | Description                                                    |
|----------------|--------------------------------------|----------------------------------------------------------------|
| Q1SCORE        | ADAS-Cog                             | Word Recall                                                    |
| Q2SCORE        | ADAS-Cog                             | Commands                                                       |
| Q3SCORE        | ADAS-Cog                             | Constructional Praxis                                          |
| Q4SCORE        | ADAS-Cog                             | Delayed Word Recall                                            |
| Q5SCORE        | ADAS-Cog                             | Naming                                                         |
| Q6SCORE        | ADAS-Cog                             | Ideational Praxis                                              |
| Q7SCORE        | ADAS-Cog                             | Orientation                                                    |
| Q8SCORE        | ADAS-Cog                             | Word Recognition                                               |
| Q9SCORE        | ADAS-Cog                             | Remembering Test Instructions                                  |
| Q10SCORE       | ADAS-Cog                             | Comprehension                                                  |
| Q11SCORE       | ADAS-Cog                             | Word-finding Difficulty                                        |
| Q12SCORE       | ADAS-Cog                             | Language                                                       |
| Q13SCORE       | ADAS-Cog                             | Number cancellation                                            |
| MMORITIME      | MMSE                                 | Orientation to time                                            |
| MMORISPACE     | MMSE                                 | Orientation to space                                           |
| MMREGI         | MMSE                                 | Three word registration                                        |
| MMRECALL       | MMSE                                 | Three word recall                                              |
| MMSPELLBKW     | MMSE                                 | Spelling a 5 letters word backwards                            |
| MMNAM          | MMSE                                 | Naming 2 objects                                               |
| MMCOMMAND      | MMSE                                 | Following a verbal command                                     |
| MMREPEAT       | MMSE                                 | Repeating a short sentence                                     |
| MMREAD         | MMSE                                 | Reading a sentence wit an instruction                          |
| MMWRITE        | MMSE                                 | Writing a sentence about anything                              |
| MMDRAW         | MMSE                                 | Copying a drawing                                              |
| TRAILS         | MoCA                                 | Trails                                                         |
| CUBE           | MoCA                                 | Copying a cube drawing                                         |
| MOCACLOCK      | MoCA                                 | Drawing a clock                                                |
| MOCANAM        | MoCA                                 | Naming 3 animals                                               |
| MOCADIG        | MoCA                                 | Repeating digits forward and backwards                         |
| MOCALLET       | MoCA                                 | Tapping with the hand when a letter is read from a list        |
| MOCASERIAL     | MoCA                                 | Serial subtraction starting at 100                             |
| MOCAREP        | MoCA                                 | Repeating 2 sentences                                          |
| MOC AFLUEN     | MoCA                                 | Naming words that beginwith the letter F                       |
| MOC AABS       | MoCA                                 | Abstraction of similarities between words                      |
| MOCADLREC      | MoCA                                 | Five word recall                                               |
| MOC AORI       | MoCA                                 | Orientation to time and space                                  |
| CLOCKSCOR      | Clock Drawing test                   | Drawing a clock with details                                   |
| COPYSCOR       | Clock Drawing test                   | Copying the drawing of a clock                                 |
| TRAASCOR       | Trail Making test                    | Time to complete Part A                                        |
| TRABSCOR       | Trail Making test                    | Time to complete Part B                                        |
| LIMMTOTAL      | Logical Memory test                  | Immediate recall of a story read by the examiner               |
| LDELTOTAL      | Logical Memory test                  | Delayed recall of a story read by the examiner                 |
| CATANIMSC      | Category Fluency test                | Naming animals                                                 |
| RAVLT.IMMED    | Rey AVLT                             | Repeating a list of 15 words 5 times                           |
| AVTOT6         | Rey AVLT                             | Recall of the first list of words after a second list was read |
| AVTOTB         | Rey AVLT                             | Repeating words from the second list                           |
| AVDEL30MIN     | Rey AVLT                             | Recall of words from the first list after 30 minutes           |
| AVDELTOT       | Rey AVLT                             | Delayed recognition of written words from the first list       |
| BMNOCUE        | Boston /<br>Multilingual Naming test | Naming objects in pictures                                     |
| BMCUED         | Boston /<br>Multilingual Naming test | Naming objects in pictures after semantic cues                 |

# 1 Standardized regression based (SRB) $z$ -scores

Parameters to calculate the SRB  $z$ -scores, obtained from the linear regression with a sample of 400 cognitively unimpaired individuals:

| Sub-score code | Regression coefficients |                         |                   | $\sigma$ |
|----------------|-------------------------|-------------------------|-------------------|----------|
|                | Intercept ( $\beta_0$ ) | Education ( $\beta_1$ ) | Age ( $\beta_2$ ) |          |
| Q1SCORE        | 1.044                   | -0.045                  | 0.034             | 1.294    |
| Q2SCORE        | 0.072                   | -0.001                  | 0                 | 0.353    |
| Q3SCORE        | 0.178                   | -0.015                  | 0.006             | 0.55     |
| Q4SCORE        | -0.549                  | -0.065                  | 0.06              | 1.811    |
| Q5SCORE        | -0.094                  | -0.001                  | 0.002             | 0.265    |
| Q6SCORE        | 0.145                   | -0.001                  | -0.001            | 0.231    |
| Q7SCORE        | 0.258                   | -0.009                  | 0                 | 0.321    |
| Q8SCORE        | 5.095                   | 0.035                   | -0.037            | 2.375    |
| Q9SCORE        | -0.042                  | -0.006                  | 0.002             | 0.148    |
| Q10SCORE       | -0.203                  | 0.001                   | 0.003             | 0.148    |
| Q11SCORE       | -0.266                  | 0                       | 0.004             | 0.257    |
| Q12SCORE       | -0.138                  | 0.001                   | 0.002             | 0.171    |
| Q13SCORE       | -0.405                  | -0.001                  | 0.015             | 0.819    |
| MMORITIME      | -0.024                  | 0.001                   | 0.001             | 0.301    |
| MMORISPACE     | 0.432                   | -0.009                  | -0.002            | 0.351    |
| MMREGI         | -0.02                   | -0.001                  | 0.001             | 0.1      |
| MMRECALL       | -0.556                  | -0.016                  | 0.015             | 0.621    |
| MMSPELLBKW     | 0.529                   | -0.032                  | 0.002             | 0.492    |
| MMNAM          | -0.05                   | 0.001                   | 0.001             | 0.05     |
| MMCOMMAND      | 0.103                   | -0.007                  | 0.001             | 0.244    |
| MMREPEAT       | 0.252                   | -0.005                  | -0.001            | 0.264    |
| MMREAD         | 0.028                   | 0                       | 0                 | 0.05     |
| MMWRITE        | -0.02                   | 0.001                   | 0                 | 0.05     |
| MMDRAW         | 0.183                   | -0.01                   | 0.001             | 0.241    |
| TRAILS         | -0.078                  | -0.008                  | 0.004             | 0.27     |
| CUBE           | 0.451                   | -0.03                   | 0.004             | 0.447    |
| MOCACLOCK      | -0.058                  | -0.003                  | 0.005             | 0.483    |
| MOCANAM        | -0.102                  | 0                       | 0.003             | 0.276    |
| MOCADIG        | -0.001                  | -0.008                  | 0.003             | 0.26     |
| MOCALET        | -0.113                  | -0.002                  | 0.003             | 0.177    |
| MOCASERIAL     | 0.153                   | -0.016                  | 0.003             | 0.385    |
| MOCAREP        | 0.14                    | -0.018                  | 0.005             | 0.454    |
| MOCAFLUEN      | 0.198                   | -0.016                  | 0.003             | 0.385    |
| MOCAABS        | 0.457                   | -0.029                  | 0.002             | 0.393    |
| MOCADLREC      | -2.029                  | -0.049                  | 0.074             | 1.691    |
| MOCAORI        | 0.271                   | -0.005                  | -0.002            | 0.254    |
| CLOCKSCOR      | 0.092                   | -0.012                  | 0.005             | 0.536    |
| COPYSCOR       | 0.167                   | 0.003                   | -0.001            | 0.42     |
| TRAASCOR       | 2.772                   | -0.099                  | 0.42              | 9.601    |
| TRABSCOR       | 9.705                   | -1.968                  | 1.386             | 39.867   |
| LIMMTOTAL      | 15.084                  | -0.242                  | -0.012            | 3.086    |
| LDELTOTAL      | 15.238                  | -0.234                  | -0.002            | 3.27     |
| CATANIMSC      | 36.053                  | -0.62                   | 0.174             | 5.35     |
| RAVLT.IMMED    | 2.848                   | -0.473                  | 0.456             | 9.81     |
| AVTOT6         | -0.858                  | -0.15                   | 0.123             | 3.248    |
| AVTOTB         | 4.328                   | -0.072                  | 0.089             | 1.988    |
| AVDEL30MIN     | -1.107                  | -0.075                  | 0.129             | 3.9      |
| AVDELTOT       | -1.478                  | -0.042                  | 0.058             | 2.267    |
| BMNOCUE        | 2.035                   | -0.134                  | 0.026             | 1.995    |
| BMCUED         | 29.761                  | 0.032                   | -0.007            | 0.592    |

Explicit calculation of SRB  $z$ -score for a particular sub-score was given by:

$$z = \frac{\text{observed sub-score} - (\beta_0 + \beta_1 \times \text{Education} + \beta_2 \times \text{Age})}{\sigma} \quad (1)$$

## 2 Variability of sub-scores

Portion of the sub-score variance explained by the samples in the 98th, 95th, and 90th percentile:

| Sub-score code | Portion of the variance explained by |                 |                 | inflated variance |
|----------------|--------------------------------------|-----------------|-----------------|-------------------|
|                | 98th percentile                      | 95th percentile | 90th percentile |                   |
| Q1SCORE        | 0.870                                | 0.781           | 0.672           |                   |
| Q2SCORE        | 0.544                                | 0.345           | 0.000           | *                 |
| Q3SCORE        | 0.823                                | 0.796           | 0.743           |                   |
| Q4SCORE        | 0.874                                | 0.759           | 0.608           |                   |
| Q5SCORE        | 0.629                                | 0.458           | 0.126           |                   |
| Q6SCORE        | 0.393                                | 0.200           | 0.001           | *                 |
| Q7SCORE        | 0.500                                | 0.281           | 0.192           |                   |
| Q8SCORE        | 0.861                                | 0.744           | 0.629           |                   |
| Q9SCORE        | 0.296                                | 0.009           | 0.008           |                   |
| Q10SCORE       | 0.383                                | 0.007           | 0.006           |                   |
| Q11SCORE       | 0.625                                | 0.392           | 0.204           |                   |
| Q12SCORE       | 0.307                                | 0.004           | 0.003           |                   |
| Q13SCORE       | 0.845                                | 0.720           | 0.586           |                   |
| MMORITIME      | 0.535                                | 0.413           | 0.218           |                   |
| MMORISPACE     | 0.688                                | 0.564           | 0.429           |                   |
| MMREGI         | 0.002                                | 0.002           | 0.002           | **                |
| MMRECALL       | 0.839                                | 0.614           | 0.412           |                   |
| MMSPELLBKW     | 0.548                                | 0.296           | 0.012           |                   |
| MMNAM          | 0.002                                | 0.002           | 0.001           | **                |
| MMCOMMAND      | 0.835                                | 0.578           | 0.082           |                   |
| MMREPEAT       | 0.883                                | 0.700           | 0.345           |                   |
| MMREAD         | 0.001                                | 0.001           | 0.001           | **                |
| MMWRITE        | 0.000                                | 0.000           | 0.000           | **                |
| MMDRAW         | 0.833                                | 0.574           | 0.082           |                   |
| TRAILS         | 0.873                                | 0.682           | 0.324           |                   |
| CUBE           | 0.957                                | 0.893           | 0.778           |                   |
| MOCACLOCK      | 0.764                                | 0.553           | 0.456           |                   |
| MOCANAM        | 0.668                                | 0.525           | 0.250           |                   |
| MOCADIG        | 0.609                                | 0.417           | 0.062           |                   |
| MOCALET        | 0.708                                | 0.264           | 0.006           |                   |
| MOCASERIAL     | 0.657                                | 0.399           | 0.254           |                   |
| MOCAREP        | 0.839                                | 0.605           | 0.476           |                   |
| MOC AFLUEN     | 0.939                                | 0.847           | 0.673           |                   |
| MOCAABS        | 0.802                                | 0.520           | 0.341           |                   |
| MOCADLREC      | 0.936                                | 0.895           | 0.838           |                   |
| MOCAORI        | 0.722                                | 0.497           | 0.351           |                   |
| CLOCKSCOR      | 0.723                                | 0.526           | 0.309           |                   |
| COPYSCOR       | 0.586                                | 0.488           | 0.363           |                   |
| TRAASCOR       | 0.543                                | 0.418           | 0.304           |                   |
| TRABSCOR       | 0.705                                | 0.482           | 0.316           |                   |
| LIMMTOTAL      | 0.882                                | 0.775           | 0.664           |                   |
| LDELTOTAL      | 0.907                                | 0.802           | 0.690           |                   |
| CATANIMSC      | 0.911                                | 0.855           | 0.782           |                   |
| RAVLT.IMMED    | 0.907                                | 0.841           | 0.762           |                   |
| AVTOT6         | 0.928                                | 0.861           | 0.771           |                   |
| AVTOTB         | 0.901                                | 0.824           | 0.730           |                   |
| AVDEL30MIN     | 0.958                                | 0.920           | 0.863           |                   |
| AVDELTOT       | 0.805                                | 0.654           | 0.487           |                   |
| BMNOCUE        | 0.643                                | 0.468           | 0.313           |                   |
| BMCUED         | 1.006                                | 1.019           | 1.046           | +                 |

### 3 Correlations between sub-scores

Pairwise sub-score correlations were tested and threshold for significance was set at 0.01 for uncorrected  $p$ -values. Figure 1 shows the significant correlations between pairs of sub-scores.

Sub-scores that showed no significant correlation (greater than 0.25) with any other sub-score evaluating similar abilities and did not depend on a similar task than any other one were not included in the factor model.

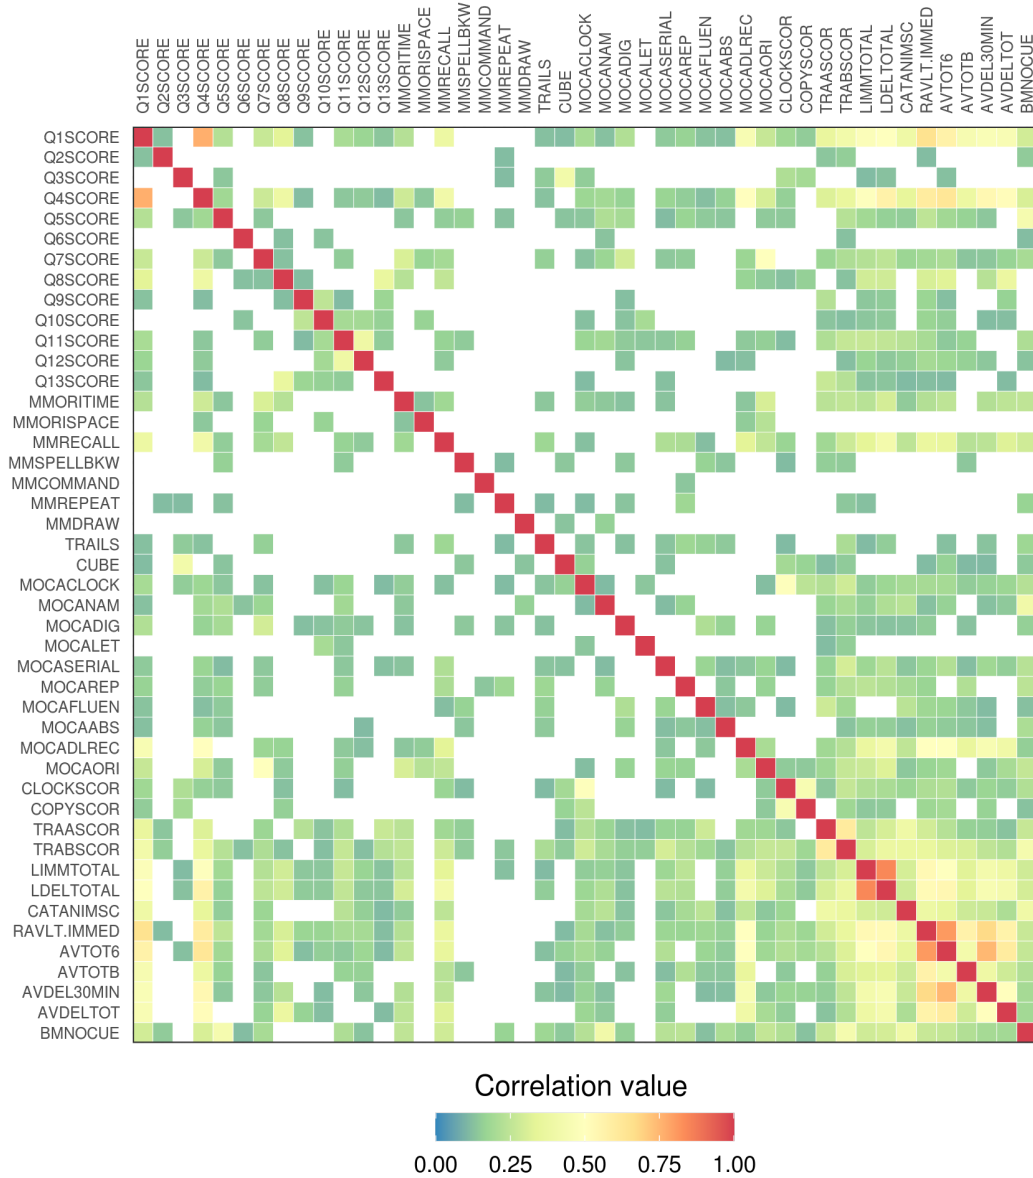

Figure 1: Significant correlations (uncorrected  $p$ -value  $\leq 0.01$ ) between sub-scores calculated in the data partition used for CFA.
